# Supplementary material
Source: PubMed Central journal article supplement (PMC7602359)

**Additional file 1:** Spatiotemporal clustering of COVID-19 incident cases in stage1 from January 20 to February 6, 2020 (a) and stage2 from February 7 to March 4, 2020 (b) (including Hubei province). We drew this figure using ArcGIS software v10.2.2.

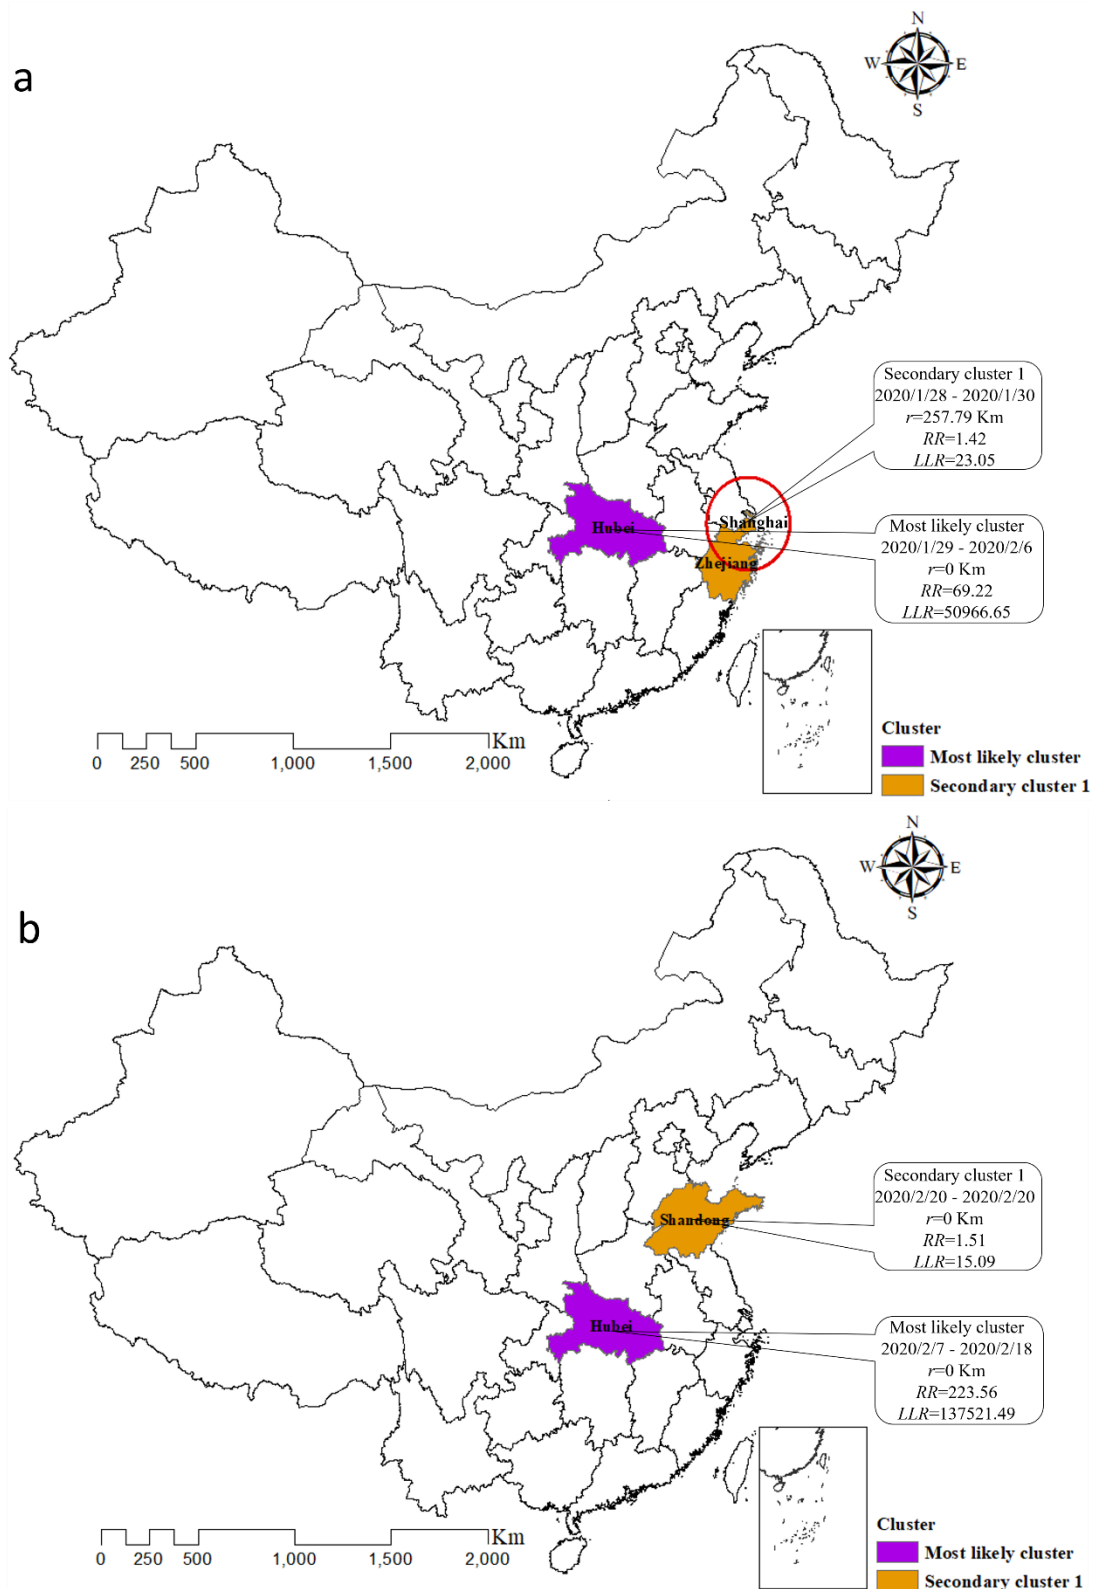

Supplement: 12879_2020_5537_MOESM1_ESM.pdf [file 12879_2020_5537_MOESM1_ESM.pdf]
